# Supplementary material for: V6O13 Micro-Flower Arrays Grown In Situ on Ni Foam as Efficient Electrocatalysts for Hydrogen Evolution at Large Current Densities
Source: MDPI journal article supplement (doi:10.3390/catal13050914), 2023-05-22
Supplement: s1 [file s1]

## Supplementary Materials

# V<sub>6</sub>O<sub>13</sub> Micro-Flower Arrays Grown In Situ on Ni Foam as Efficient Electrocatalysts for Hydrogen Evolution at Large Current Densities

Yajie Xie <sup>1</sup>, Jianfeng Huang <sup>1,\*</sup>, Yufei Wang <sup>1</sup>, Liyun Cao <sup>1</sup>, Yong Zhao <sup>2</sup>, Koji Kajiyoshi <sup>3</sup>, Yijun Liu <sup>2</sup> and Liangliang Feng <sup>1,4,\*</sup>

<sup>1</sup> School of Material Science and Engineering, International S&T Cooperation Foundation of Shaanxi Province, Shaanxi University of Science and Technology, Xi'an 710021, China

<sup>2</sup> Guangdong Mona Lisa Group Co., Ltd., Foshan 528211, China

<sup>3</sup> Research Laboratory of Hydrothermal Chemistry, Kochi University, Kochi 780-8520, Japan

<sup>4</sup> Key Laboratory of Advanced Energy Materials Chemistry (Ministry of Education), Nankai University, Tianjin 300071, China

\* Correspondance: huangjf@sust.edu.cn (J.H.); fengll@sust.edu.cn (L.F.)

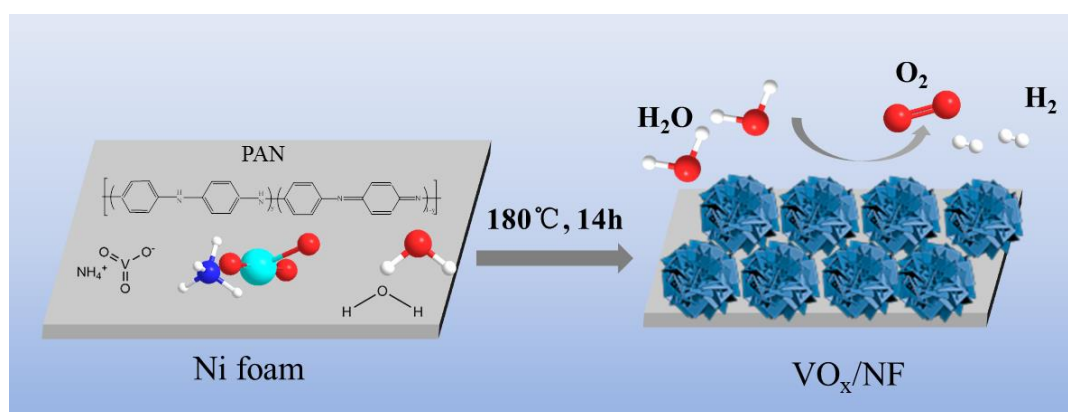

**Figure S1.** Synthetic strategy and schematic illustration of the construction of VOX/NF.

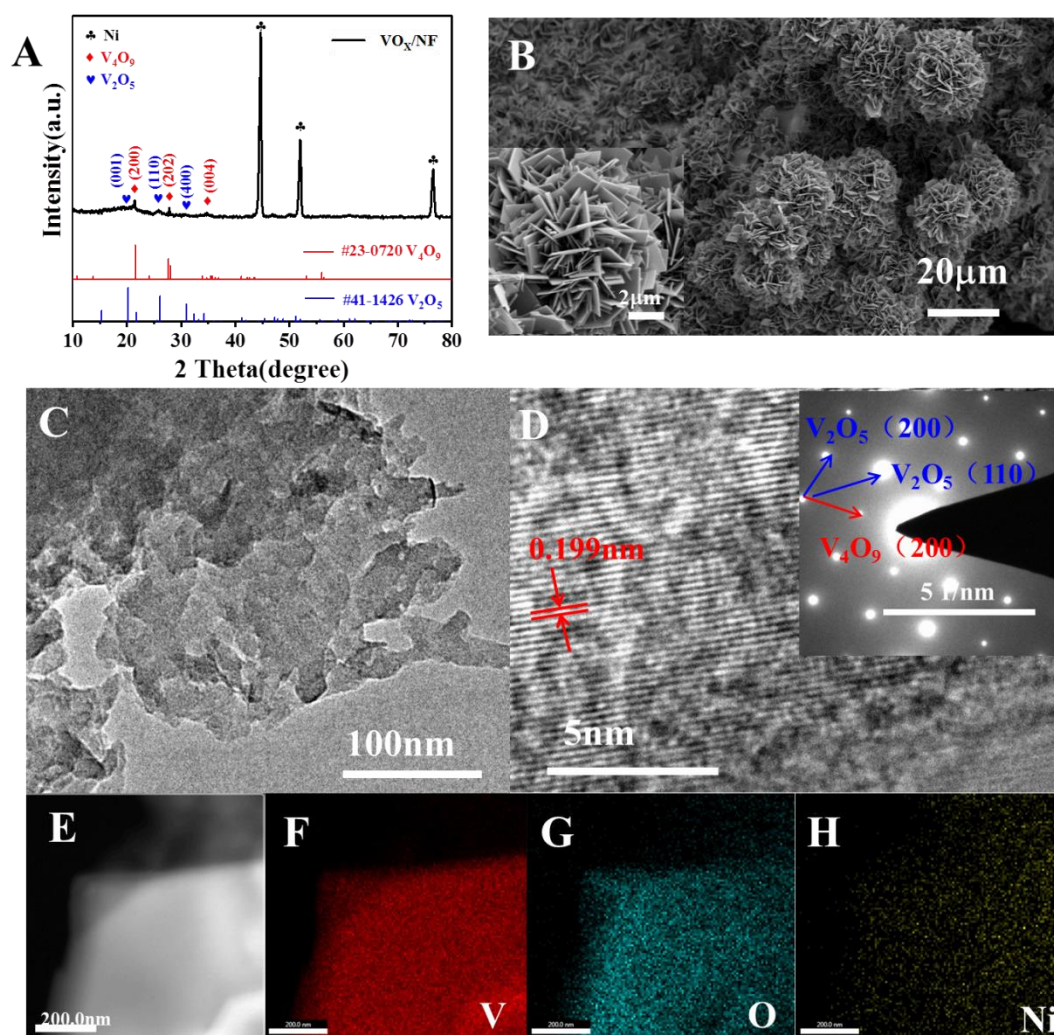

**Figure S2.** (A) XRD pattern of the as-synthesized VO<sub>x</sub>/NF; (B-C) SEM and TEM images of the VO<sub>x</sub>/NF nanosheets grown on NF substrate with different magnifications; (D) HRTEM image of VO<sub>x</sub>/NF, with SAED pattern shown in the inset, (E-H) TEM image and the corresponding elemental mapping images of VO<sub>x</sub>/NF.

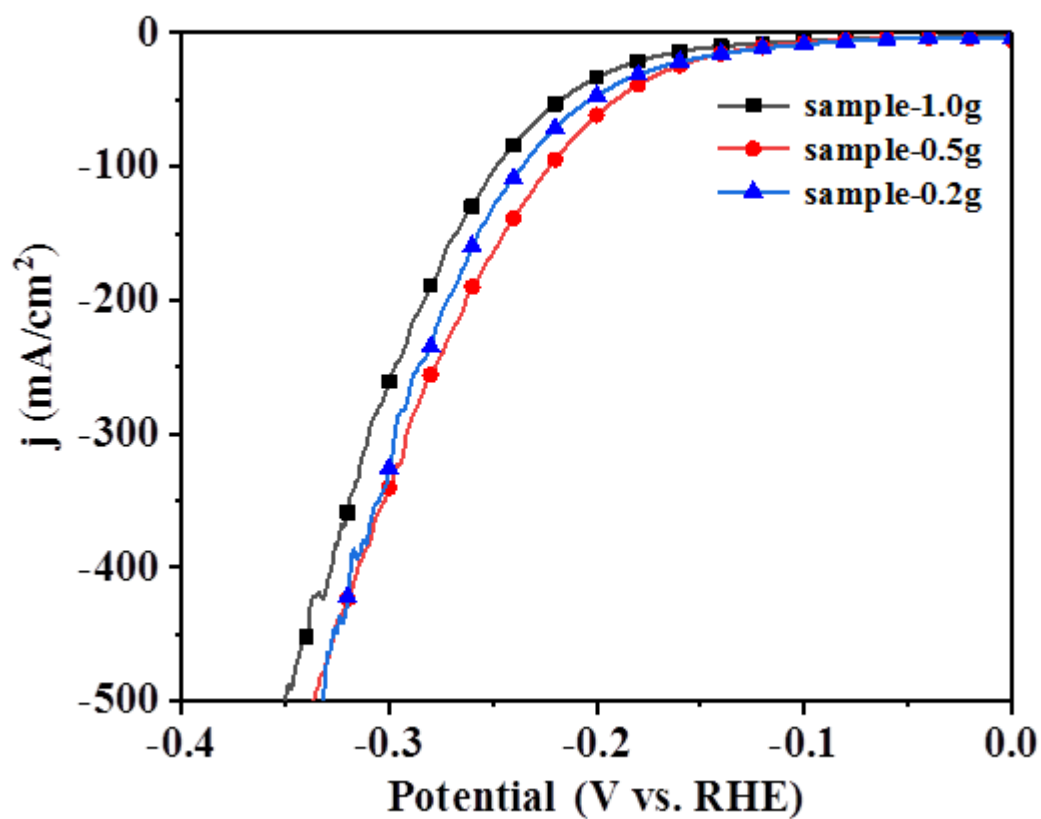

**Figure S3.** LSV curves of sample-0.2g, sample-0.5g and sample-1.0g for HER.

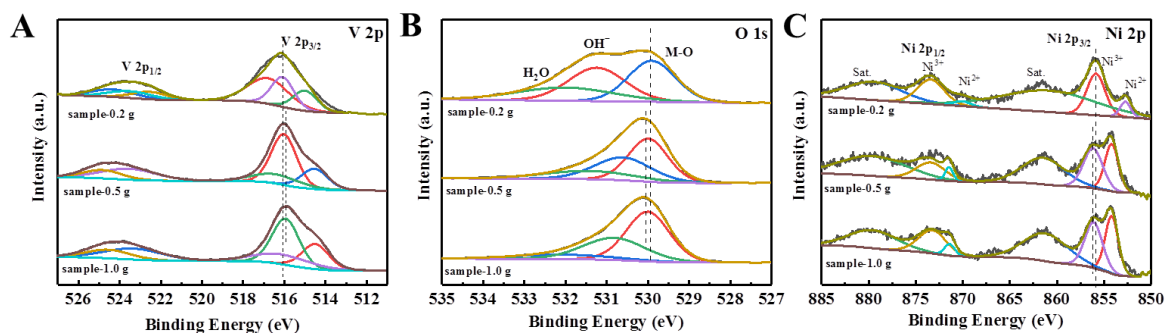

**Figure S4.** XPS spectra of (A) sample-0.2g, (B) sample-0.5g and (C) sample-1.0g for HER.

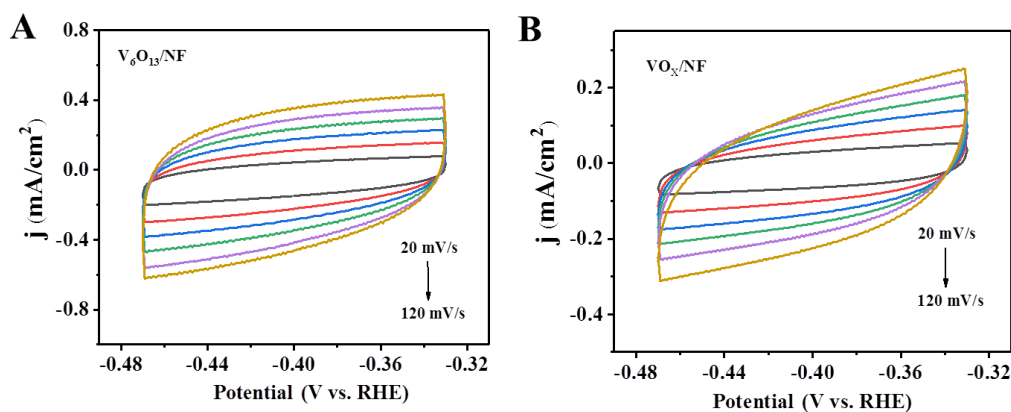

**Figure S5.** CV curves of  $V_6O_{13}/NF$  (A) and  $VO_x/NF$  (B).

**Table S1.** Comparison of the electrocatalytic activity of  $V_6O_{13}/NF$  with previously reported vanadium oxide electrocatalysts.

| Catalysts            | Electrolyte     | Current Density ( $j$ , mA/cm <sup>2</sup> ) | Overpotential at Corresponding $j$ (mV) | Reference                                    |
|----------------------|-----------------|----------------------------------------------|-----------------------------------------|----------------------------------------------|
| $V_6O_{13}/NF$       | 1.0 M KOH       | 100                                          | 125                                     | This work                                    |
|                      |                 | 1000                                         | 298                                     |                                              |
| $V_{10}O_{24}.nH_2O$ | 0.5 M $H_2SO_4$ | 10                                           | 118                                     | Electrochim. Acta 2019, 312, 89–99 [12]      |
|                      |                 | 600                                          | 405                                     |                                              |
| $V_2O_5$             | 1.0 M KOH       | 10                                           | 98                                      | Chem. Eng. Sci. 2020, 227, 115915 [14]       |
|                      |                 | 100                                          | 232                                     |                                              |
| $Ni_4Mo-V_2O_3/NF$   | 1.0 M PBS       | 10                                           | 39.3                                    | J. Mater. Chem. A, 2020, 8, 12169-12176 [23] |
| $Ni_{0.8}/V_2O_3$    | 1.0 M KOH       | 10                                           | 44                                      | Electrochim. Acta, 2019, 320, 134535 [24]    |
| $Ni-V_2O_3$          | 1.0 M KOH       | 10                                           | 136                                     | J. Energy Chem. 2020, 50, 280-285 [25]       |

**Table S2.** Fitted data from Nyquist plots of as-synthesized samples in electrocatalytic HER test.

| Electrocatalysts | $R_s$ ( $\Omega$ ) | $R_{ct}$ ( $\Omega$ ) |
|------------------|--------------------|-----------------------|
| $V_6O_{13}/NF$   | 2.597              | 1.819                 |
| $VO_x/NF$        | 2.866              | 2.067                 |
| NF               | 2.287              | 6.101                 |
