# Supplementary material for: V6O13 Micro-Flower Arrays Grown In Situ on Ni Foam as Efficient Electrocatalysts for Hydrogen Evolution at Large Current Densities
Source: MDPI journal article supplement (doi:10.3390/catal13050914), 2023-05-22
Supplement: s1 [file s1]

Archive with 1 entries (1 files):
- catalysts-2265443-supplementary.pdf
